# Supplementary material for: Reusable components for online reputation systems
Source: Springer Nature journal article supplement (doi:10.1186/s40493-015-0015-3), 2015-05-13
Supplement: MOESM1 [file 11901526]

**Table S1 The hierarchical component taxonomy**

| Primary component class | Secondary component class | Component term            | Subset              |
|-------------------------|---------------------------|---------------------------|---------------------|
| filtering               | attribute-based filter    | age-based filter          | absolute age filter |
|                         |                           |                           | relative age filter |
|                         |                           | multiple referrals        |                     |
|                         | statistic-based filter    | weight-based filter       |                     |
|                         |                           | beta statistic filter     |                     |
|                         |                           | clustering-based filter   | clustering filter   |
| weighting               | context comparability     | context similarity        | absolute congruence |
|                         |                           |                           | ontology-based      |
|                         |                           |                           | distance-based      |
|                         | criteria comparability    | criteria similarity       | absolute congruence |
|                         |                           |                           | distance-based      |
|                         | credibility/propagation   | propagation discount      |                     |
|                         | reliability               | subjective reliability    | property similarity |
|                         |                           |                           | rating similarity   |
|                         |                           | objective reliability     | explicit            |
|                         |                           |                           | implicit            |
|                         | rating value              | asymmetric rating         |                     |
|                         | time                      | absolute time discounting |                     |
|                         |                           | relative time discounting |                     |
| aggregation             | simple arithmetic         | ranking                   |                     |
|                         |                           | summation                 |                     |
|                         |                           | average                   |                     |
|                         | statistic                 | bayesian probability      |                     |
|                         |                           | belief models             |                     |
|                         |                           | hidden markov models      |                     |
|                         | fuzzy                     | fuzzy aggregation         |                     |
|                         | graph-based               | global graph              |                     |
|                         |                           | personal graph            |                     |
